# Supplementary material for: Anti-Inflammatory Effect of Ethanolic Extract from Tabebuia rosea (Bertol.) DC., Quercetin, and Anti-Obesity Drugs in Adipose Tissue in Wistar Rats with Diet-Induced Obesity
Source: MDPI journal article supplement (doi:10.3390/molecules28093801), 2023-04-28
Supplement: s1 [file s1]

### *Characterization by Ultra Performance Liquid Chromatography mass spectrometry*

The mass spectrometry analysis was carried out in an Acquity Ultra Performance Liquid Chromatography I-class system with a diode array detector (Waters Corp. Milford, MA, USA) coupled to a mass spectrometer with an ESI ionization source and time of flight VION IMS (Waters Corp. Milford, MA, USA).

The conditions of the analysis were the following:

The sample was diluted in mass grade methanol to a concentration of 2.5 mg/mL. The column used was BEH C18 2.1 x 100 mm, 1.7  $\mu$ m. The mobile phases used were acetonitrile and water, both acidified with 0.1% formic acid.

The gradient used was the following:

| Time | Phase A | Phase B |
|------|---------|---------|
| 0    | 95      | 5       |
| 2    | 95      | 5       |
| 22   | 5       | 95      |
| 25   | 5       | 95      |
| 27   | 95      | 5       |
| 30   | 95      | 5       |

with a flow rate of 0.4 mL/min, column temperature 35°C, sample temperature 10°C, injection volume 2  $\mu$ L. An absorbance scan was carried out from 210 to 600 nm, with specific channels: 214, 280, 320, 360 (and 520 nm in positive mode). Ionization was carried out in positive and negative mode. The mode of analysis was MSE, in which the low collision energy was 6 eV, with a ramp from 15 to 45 eV at high energy. The range of masses was considered from 50 to 1800 m/z. The capillary voltage

used was 2 and 3.5 kV for negative and positive respectively, source temperature 120 °C, desolvation temperature 450 °C, Argon as collision gas and desolvation with a flow of 50 L/h and 800 L/h. , respectively, and a cone voltage of 40 V. Leucine Enkephalin was used at a concentration of 200 pg/μl as reference for mass correction with a flow of 10 μL/min.

For data analysis, UNIFI, version 1.9 SR4 Software (Waters Corp., Milford, MA, USA) was used with the libraries of the Specialized Food Analysis Laboratory, The University of Mississippi Botanical Library and The University of Ottawa Phytochemical Library. Target match tolerance set to 5 ppm. For the identification of fragments, it was compared with fragmentation patterns reported in PubChem, FooDB version 1.0, HMDB version 5.0.

Table S1. Characterization by Ultra Performance Liquid Chromatography mass spectrometry

| Compound                                                 | Response | Tr (min) | Molecular Formula | Expected Mass (g/mol) | Observed Mass (g/mol) | Fragment ions (negative mode) (m/z) |        |        |        |        |        |        |        |        |
|----------------------------------------------------------|----------|----------|-------------------|-----------------------|-----------------------|-------------------------------------|--------|--------|--------|--------|--------|--------|--------|--------|
| Ursolic acid                                             | 498472   | 18.07    | C30H48O3          | 456.70                | 456.36                | 455.35                              | 456.36 | 457.36 |        |        |        |        |        |        |
| Eriodictyol                                              | 288650   | 7.09     | C15H12O6          | 288.25                | 288.06                | 125.02                              | 151.00 | 124.02 |        |        |        |        |        |        |
| Fisetin                                                  | 217868   | 9.22     | C15H10O6          | 288.24                | 286.05                | 161.03                              |        |        |        |        |        |        |        |        |
| Chamaemeloside                                           | 187439   | 6.98     | C27H28O14         | 576.50                | 576.15                | 145.03                              | 345.10 | 231.07 | 119.05 | 163.04 | 117.03 | 327.09 | 111.01 | 461.15 |
| Salvigenin                                               | 178784   | 8.73     | C18H16O6          | 328.30                | 328.10                | 327.09                              | 297.08 | 311.06 |        |        |        |        |        |        |
| Quercetin                                                | 160013   | 8.21     | C25H10O7          | 302.23                | 302.04                | 301.04                              | 151.00 | 179.00 | 121.03 | 107.02 |        |        |        |        |
| Naringenin                                               | 154218   | 9.03     | C15H12O5          | 272.25                | 272.07                | 119.05                              | 151.00 | 177.02 | 107.01 |        |        |        |        |        |
| 7-hydroxy-2-(1-hydroxyethyl)naphto[2,3-b]furan-4,9-dione | 154218   | 9.03     | C15H12O5          | 272.25                | 272.07                | 151.00                              | 107.01 | 93.04  |        |        |        |        |        |        |
| 20R Ginsenoside                                          | 110218   | 21.10    | C42H72O13         | 785.00                | 784.49                | 737.48                              | 475.31 | 367.30 | 460.28 |        |        |        |        |        |
| Harpagoside                                              | 106377   | 7.60     | C24H30O11         | 494.50                | 494.18                | 345.10                              | 145.03 | 433.15 | 119.05 | 231.07 | 337.11 | 391.14 | 475.16 |        |
| Khellin                                                  | 102299   | 7.09     | C14H12O5          | 260.24                | 260.07                | 243.07                              | 177.06 | 241.05 | 203.04 |        |        |        |        |        |
| Luteolin                                                 | 59655    | 6.25     | C15H10O6          | 286.24                | 286.05                | 133.03                              | 175.04 | 151.04 | 107.05 |        |        |        |        |        |
| Taxifolin                                                | 52409    | 6.25     | C15H12O7          | 204.25                | 304.06                | 285.04                              | 125.02 | 301.04 | 273.04 | 227.07 |        |        |        |        |

|                            |       |       |           |         |        |        |        |        |        |        |        |        |        |        |        |        |        |        |  |
|----------------------------|-------|-------|-----------|---------|--------|--------|--------|--------|--------|--------|--------|--------|--------|--------|--------|--------|--------|--------|--|
| Ricinoic acid              | 42577 | 15.58 | C18H34O3  | 298.50  | 298.25 |        |        |        |        |        |        |        |        |        |        |        |        |        |  |
| m-Coumaric acid            | 35295 | 5.59  | C15H18O8  | 326.30  | 164.05 | 119.05 | 117.03 |        |        |        |        |        |        |        |        |        |        |        |  |
| Quercetin-7-O-glucoside    | 34257 | 7.30  | C9H8O3    | 164.16  | 464.10 | 301.04 | 463.09 | 283.10 | 161.02 |        |        |        |        |        |        |        |        |        |  |
| Brachyposide A             | 32852 | 6.43  | C29H36O15 | 624.60  | 624.20 | 307.08 | 461.17 | 271.06 | 445.15 | 593.19 | 607.20 | 339.05 | 235.06 | 433.15 | 505.17 | 551.18 | 207.07 | 167.03 |  |
| Multifidoside B            | 32852 | 6.43  | C29H36O15 | 624.60  | 624.20 | 307.08 | 461.16 | 271.06 | 445.15 | 339.05 | 235.06 | 207.07 | 167.03 |        |        |        |        |        |  |
| Betulonic acid             | 32631 | 19.32 | C30H446O3 | 454.70  | 454.34 | 325.18 |        |        |        |        |        |        |        |        |        |        |        |        |  |
| D-(+)-Mannose              | 30725 | 0.63  | C6H12O6   | 180.16  | 180.06 | 89.02  | 113.02 | 161.05 | 119.04 | 101.02 | 59.01  | 143.03 |        |        |        |        |        |        |  |
| Nipponogenin E             | 30328 | 13.27 | C30H48O5  | 488.70  | 488.35 | 469.33 | 249.22 | 293.21 | 429.30 |        |        |        |        |        |        |        |        |        |  |
| Chrysosplenetin            | 23453 | 10.39 | C19H18O8  | 3744.30 | 374.10 | 145.03 | 299.06 | 343.08 | 193.01 |        |        |        |        |        |        |        |        |        |  |
| Rhein                      | 20936 | 9.22  | C15H8O6   | 284.22  | 284.03 | 239.04 | 163.00 |        |        |        |        |        |        |        |        |        |        |        |  |
| Verbascoside               | 17757 | 6.71  | C29H26O15 | 624.60  | 624.20 | 623.20 | 179.04 | 461.17 | 624.20 |        |        |        |        |        |        |        |        |        |  |
| Hesperetin                 | 17043 | 9.23  | C16H14O6  | 302.28  | 302.08 | 301.07 | 286.04 | 257.04 |        |        |        |        |        |        |        |        |        |        |  |
| Isorhamnetin               | 14272 | 9.42  | C26H12O7  | 316.26  | 316.06 | 300.03 | 315.05 | 301.03 |        |        |        |        |        |        |        |        |        |        |  |
| Luteolin-7-O-b-D-glucoside | 13118 | 6.91  | C21H20O11 | 448.40  | 448.10 | 285.04 | 307.08 | 339.05 | 133.03 |        |        |        |        |        |        |        |        |        |  |
| Scutellarein               | 12716 | 8.19  | C15H10O6  | 286.24  | 286.05 | 117.04 | 285.04 | 255.03 |        |        |        |        |        |        |        |        |        |        |  |
| Maslinic acid              | 10844 | 21.95 | C30H48O4  | 472.70  | 472.36 | 409.35 | 393.31 |        |        |        |        |        |        |        |        |        |        |        |  |
| Hesperidin                 | 9702  | 7.11  | C28H34O15 | 610.60  | 610.19 | 259.06 | 287.06 | 125.02 | 177.06 | 447.13 | 361.09 | 124.02 |        |        |        |        |        |        |  |
| trans-Piceatannol          | 8913  | 7.09  | C14H12O4  | 244.24  | 244.07 | 243.07 | 201.06 | 215.07 | 173.06 | 225.06 |        |        |        |        |        |        |        |        |  |
| Linoleic acid              | 8791  | 19.60 | C18H32O2  | 280.40  | 280.24 | 249.22 |        |        |        |        |        |        |        |        |        |        |        |        |  |
| Enhydrin                   | 7908  | 7.61  | C23H28O10 | 464.50  | 464.17 | 345.20 | 433.15 | 231.07 | 391.14 |        |        |        |        |        |        |        |        |        |  |
| Glaucolide A               | 7908  | 7.61  | C23H28O10 | 464.50  | 464.17 | 345.10 | 433.15 | 231.07 | 391.14 | 175.04 |        |        |        |        |        |        |        |        |  |
| Methyl vanillate           | 7759  | 10.59 | C9H10O4   | 182.17  | 182.06 |        |        |        |        |        |        |        |        |        |        |        |        |        |  |
| Eupatoriopicrin            | 6704  | 11.99 | C20H26O6  | 362.40  | 362.17 | 221.15 | 220.15 | 236.11 | 205.12 | 148.05 | 177.09 | 293.18 |        |        |        |        |        |        |  |
| Enhydrin                   | 6135  | 7.86  | C23H28O10 | 464.50  | 464.17 | 345.10 | 433.15 | 231.07 | 307.08 | 301.04 |        |        |        |        |        |        |        |        |  |
| Betulonic acid             | 5018  | 19.62 | C30H46O3  | 454.70  | 454.34 | 339.20 |        |        |        |        |        |        |        |        |        |        |        |        |  |
| Terminolic acid            | 4816  | 13.92 | C30H48O6  | 504.70  | 504.34 | 457.33 | 413.34 | 309.21 |        |        |        |        |        |        |        |        |        |        |  |
| Esculetin                  | 4672  | 6.25  | C9H6O4    | 178.14  | 178.03 | 161.02 | 163.04 | 125.02 | 137.02 |        |        |        |        |        |        |        |        |        |  |
| Epicatechin                | 4540  | 7.25  | C15H14O6  | 290.27  | 290.08 | 289.07 | 137.02 | 125.02 |        |        |        |        |        |        |        |        |        |        |  |
| Linolenic acid             | 4146  | 18.43 | C18H30O2  | 278.40  | 278.22 |        |        |        |        |        |        |        |        |        |        |        |        |        |  |

|                                                            |      |       |           |        |        |        |        |        |        |        |        |        |        |                             |
|------------------------------------------------------------|------|-------|-----------|--------|--------|--------|--------|--------|--------|--------|--------|--------|--------|-----------------------------|
| Ciwujiatone                                                | 4052 | 7.51  | C22H26O9  | 434.40 | 434.16 | 249.08 | 181.05 | 161.02 | 135.05 | 221.08 | 261.08 | 123.05 |        |                             |
| Veratric acid                                              | 4020 | 7.50  | C9H10O4   | 182.17 | 182.06 | 135.05 | 137.06 | 151.04 | 133.03 | 150.03 | 123.05 | 122.04 | 107.05 |                             |
| Procyanidin B3                                             | 3974 | 8.73  | C30H26O12 | 578.50 | 578.14 | 327.09 | 285.04 |        |        |        |        |        |        |                             |
| Epiyangambin                                               | 3504 | 10.56 | C24H30O8  | 446.50 | 446.19 | 211.10 |        |        |        |        |        |        |        |                             |
| Apigenin                                                   | 3124 | 7.09  | C15H10O5  | 270.24 | 270.05 | 151.00 | 149.06 | 269.05 | 107.01 |        |        |        |        |                             |
| Conicaoside                                                | 2628 | 5.97  | C27H36O12 | 552.60 | 552.22 | 341.11 | 361.17 | 419.17 | 164.05 | 179.07 | 373.13 | 421.19 | 195.07 | 329.14                      |
| Elemicin                                                   | 2092 | 10.75 | C12H16O3  | 208.25 | 208.11 | 135.05 |        |        |        |        |        |        |        |                             |
| Cnicin                                                     | 1955 | 16.54 | C20H26O7  | 378.40 | 378.17 | 309.17 |        |        |        |        |        |        |        |                             |
| Acanthosessiligenin I                                      | 1808 | 19.32 | C31H48O5  | 500.70 | 500.35 | 325.18 | 453.34 |        |        |        |        |        |        |                             |
| Epiaschantin                                               | 1646 | 11.68 | C22H24O7  | 400.40 | 400.15 |        |        |        |        |        |        |        |        |                             |
| Cubebin                                                    | 1628 | 8.70  | C20H20O6  | 356.40 | 356.13 | 175.04 |        |        |        |        |        |        |        |                             |
| Conicaoside                                                | 1570 | 9.55  | C27H36O12 | 552.60 | 552.22 | 145.03 | 345.10 | 435.17 | 163.04 | 507.15 | 433.15 | 535.18 | 419.17 | 117.04 231.07 117.04 175.04 |
| Flavokawain B                                              | 1501 | 8.74  | C17H16O4  | 284.31 | 284.11 | 175.04 | 267.07 | 251.06 |        |        |        |        |        |                             |
| Chiisanogenin                                              | 1480 | 13.79 | C30H44O5  | 484.70 | 484.32 |        |        |        |        |        |        |        |        |                             |
| 5-hydroxy-2-(1'-hydroxyethyl)naphto[2,3-b]furan-4,9-dione) | 1412 | 9.39  | C14H10O5  | 258.23 | 258.05 | 241.01 |        |        |        |        |        |        |        |                             |
| Arjungenin                                                 | 1410 | 10.85 | C30H48O6  | 504.70 | 504.35 | 193.09 | 133.03 |        |        |        |        |        |        |                             |
| Eleutheroside E1                                           | 1388 | 6.90  | C28H36O13 | 580.60 | 580.21 | 307.08 | 523.14 | 175.04 | 389.12 |        |        |        |        |                             |
| Bakkenolide C                                              | 1387 | 11.48 | C20H28O5  | 348.40 | 348.19 | 145.03 |        |        |        |        |        |        |        |                             |
| Caffeic acid 3-glucoside                                   | 125  | 4.32  | C15H18O9  | 342.30 | 342.09 | 179.04 | 161.04 | 149.05 | 89.03  | 165.06 | 123.01 | 327.11 | 138.03 |                             |

| Compound   | Response | Tr (min) | Molecular Formula | Expected Mass (g/mol) | Observed Mass (g/mol) | Fragment ions (positive mode) (m/z) |        |        |        |        |        |        |        |  |
|------------|----------|----------|-------------------|-----------------------|-----------------------|-------------------------------------|--------|--------|--------|--------|--------|--------|--------|--|
| Coumarin   | 57245    | 7.00     | C9H6O2            | 146.14                | 146.04                | 147.04                              | 119.05 | 91.05  | 148.05 |        |        |        |        |  |
| Specioside | 44496    | 7.00     | C24H28O12         | 508.50                | 508.16                | 147.04                              | 119.05 | 321.13 | 165.06 | 329.10 | 369.10 | 311.09 | 183.07 |  |

|                       |       |       |            |        |        |        |        |        |        |        |        |        |
|-----------------------|-------|-------|------------|--------|--------|--------|--------|--------|--------|--------|--------|--------|
| Cedrelanol            | 20725 | 20.90 | C15H26O    | 222.37 | 222.20 | 205.20 | 93.07  | 135.12 | 91.05  | 121.10 | 95.09  | 149.13 |
| Salvigenin            | 20502 | 7.00  | C18H16O6   | 328.30 | 328.09 | 311.09 | 147.04 | 119.05 |        |        |        |        |
| Luteolin              | 19955 | 9.24  | C15H10O6   | 286.24 | 286.05 | 287.06 | 153.02 |        |        |        |        |        |
| Morin                 | 14519 | 8.24  | C15H10O7   | 302.23 | 302.04 | 147.05 | 303.05 | 229.05 |        |        |        |        |
| Caryophyllene         | 14432 | 20.90 | C15H24     | 204.35 | 204.19 | 93.07  | 135.12 | 91.05  | 121.10 | 95.09  | 149.13 |        |
| Acanthopanaxoside E   | 12597 | 13.66 | C42H66O15  | 811.00 | 810.44 | 189.10 | 614.35 | 547.34 | 279.13 | 476.31 |        |        |
| Germbudine            | 10240 | 10.87 | C37H59NO12 | 709.90 | 709.40 | 519.32 |        |        |        |        |        |        |
| Germine               | 10003 | 7.97  | C27H43NO8  | 509.60 | 509.30 | 195.07 | 479.28 |        |        |        |        |        |
| Gigantecin            | 9419  | 22.05 | C37H66O8   | 638.90 | 638.48 | 541.38 | 325.24 | 497.35 | 297.25 | 205.20 |        |        |
| Eleutheroside B1      | 9301  | 0.95  | C17H20O10  | 384.30 | 384.11 | 209.04 |        |        |        |        |        |        |
| Eriodictyol           | 9231  | 8.11  | C15H12O6   | 288.25 | 288.06 | 163.04 | 153.02 |        |        |        |        |        |
| Cinerenin             | 5063  | 6.94  | C17H20O6   | 320.30 | 320.12 |        |        |        |        |        |        |        |
| Homovanillic Acid     | 4716  | 7.53  | C9H10O4    | 182.17 | 182.06 | 165.05 | 137.06 |        |        |        |        |        |
| Acanthosessilioside C | 4540  | 11.61 | C37H58O12  | 694.80 | 695.40 | 471.29 | 447.20 |        |        |        |        |        |
| Acantrifoic acid A    | 4034  | 17.85 | C32H48O7   | 544.70 | 530.33 | 89.06  | 503.31 |        |        |        |        |        |
| Galphin A             | 2826  | 14.91 | C34H48O10  | 616.70 | 617.33 | 189.10 | 569.32 | 481.26 | 437.24 | 247.10 |        |        |
| Cubebin               | 147   | 11.01 | C20H20O6   | 356.40 | 356.13 | 137.06 |        |        |        |        |        |        |

Table S2. Composition of (A) standard and (B) high-fat diet.

**A)**

| <b>Component</b> | <b>Composition g/100g diet</b> |
|------------------|--------------------------------|
| Protein          | 23.9                           |
| Fat              | 5.7                            |
| Fiber crude      | 5.1                            |
| Carbohydrates*   | 38.13                          |
| Minerals         | 7%                             |
| Vitamin mix      | #                              |

\* According to the compounds that are carbohydrates in the formulation

**B)**

| <b>Component</b>         | <b>Composition g/100g diet</b> |
|--------------------------|--------------------------------|
| Sucrose                  | 34.0                           |
| Milk fat                 | 21.0                           |
| Casein                   | 19.5                           |
| Corn starch              | 14.05                          |
| Cellulose                | 5.0                            |
| Mineral mix <sup>1</sup> | 4.3                            |
| Vitamin mix <sup>2</sup> | 1.5                            |
| DL methionine            | 0.3                            |
| Choline                  | 0.2                            |
| Cholesterol              | 0.15                           |

<sup>1</sup>Mineral mix (AIN-93 G-MX); <sup>2</sup>Vitamin mix (AIN-93-VX)

Table S3. Differences in fold-change of all significant results of the treatment groups against the obesity control group.

Log2 Fold-change VS HF-Ob

|                    | <b>HF+Tr</b> | <b>HF+Q</b> | <b>HF+Orl</b> | <b>HF+F</b> | <b>HF+P</b> |
|--------------------|--------------|-------------|---------------|-------------|-------------|
| <b>IL6</b>         | -3.67173522  | -5.13495448 | -6.26428298   | -3.77567608 | -3.7154972  |
| <b>IL4</b>         | 1.72406245   | 0.29591517  | 2.16336426    | -1.67851493 | 0.73740848  |
| <b>IL-1B</b>       | -1.50404251  | -1.33536713 | 0.47424823    | -1.30159425 | -0.29024078 |
| <b>IL18</b>        | -0.64711898  | -1.36448335 | -0.28228229   | -1.07272038 | -0.89283651 |
| <b>TNF</b>         | 0.63226163   | 0.87073611  | 1.51150947    | 1.03706135  | 0.80335623  |
| <b>LEP</b>         | -0.82198346  | -2.70148701 | 1.18522103    | 1.26622268  | 0.11339368  |
| <b>ADIPONECTIN</b> | 0.9156736    | 0.85779269  | -0.0529448    | 0.07594325  | 0.7293004   |
| <b>SOCS1</b>       | 0.31826856   | 1.26829312  | 6.41180034    | 5.91706202  | 6.95258624  |
| <b>SOCS3</b>       | 0.92111623   | 0.89325113  | 4.54117643    | 2.55473454  | 4.07786973  |
| <b>STAT3</b>       | -0.10643186  | 0.2410081   | -0.39711559   | -0.5320487  | -1.09573487 |
| <b>NF-KB</b>       | -2.24023919  | -2.23603767 | -4.4243291    | -5.09002545 | -3.68163852 |
| <b>PPARG</b>       | -0.89695562  | -0.70984617 | -2.29721776   | -1.90031875 | -0.91116948 |
| <b>HIF-1A</b>      | -1.31866408  | -1.38539019 | -2.81128152   | -3.24362464 | -2.40667466 |
| <b>LIPE</b>        | 1.23874621   | -1.09108011 | -3.15988633   | -1.54732176 | -4.63191328 |

The negative sign indicates under-expression compared to the obese control group (HF-Ob), while the positive sign indicates mRNA overexpression.
